1  
2 **Robust linear modelling in ElectroEncephaloGraphy can be obtained**  
3 **using single weights reflecting each single trials' dynamics**  
4

5  
6 **Cyril Pernet<sup>1,2</sup>, Guillaume Rousselet<sup>3</sup>, Ignacio Suay Mas<sup>1</sup>,**  
7 **Ramon Martinez<sup>4</sup>, Rand Wilcox<sup>5</sup> & Arnaud Delorme<sup>4,6,7</sup>**  
8

9  
10 <sup>1</sup> Centre for Clinical Brain Sciences, University of Edinburgh, United Kingdom, <sup>2</sup> Neurobiology  
11 Research Unit, Copenhagen University Hospital, Rigshospitalet, Denmark, <sup>3</sup> Centre for Cognitive  
12 Neuroimaging, School of Psychology, University of Glasgow, United Kingdom, <sup>4</sup> Swartz Center for  
13 Computational Neurosciences, University of California San Diego, United States of America, <sup>5</sup>  
14 Department of Psychology, University of Southern California, United States of America, <sup>6</sup> Centre  
15 de Recherche Cerveau et Cognition, Université Toulouse III Paul Sabatier, Toulouse, France, <sup>7</sup>  
16 Centre National de la Recherche Scientifique, Centre de Recherche Cerveau et Cognition,  
17 Toulouse, France  
18

19  
20 **Abstract**

21  
22 Being able to remove or weigh down the influence of outlier data is desirable for any statistical  
23 models. While Magnetic and ElectroEncephaloGraphic (MEEG) data used to average trials per  
24 condition, it is now becoming common practice to use information from all trials to build linear  
25 models. Individual trials can, however, have considerable weight and thus bias inferential results.  
26 Here, rather than looking for outliers independently at each data point, we apply the principal  
27 component projection (PCP) method at each channel, deriving a single weight per trial at each  
28 channel independently. Using both synthetic data and open EEG data, we show (1) that PCP is  
29 efficient at detecting a large variety of outlying trials; (2) how PCP derived weights can be  
30 implemented in the context of the general linear model with accurate control of type 1 family-  
31 wise error rate; and (3) that our PCP-based Weighted Least Square (WLS) approach leads to in  
32 crease in power at the group results comparable to a much slower Iterative Reweighted Least  
33 Squares (IRLS), although the weighting scheme is markedly different. Together, results show that  
34 WLS based on PCP weights derived upon whole trial profiles is an efficient method to weigh down  
35 the influence of outlier data in linear models.  
36

37 **Keywords:** ElectroEncephaloGraphy, single trials, Weighted Least Squares, General Linear Model  
38

39 **Data availability:** all data used are publicly available (CC0), all code (simulations and data  
40 analyzes) is also available online in the LIMO MEEG GitHub repository (MIT license).

## 41 Introduction

42  
43 MEEG data are often epoched to form 3 or 4-dimensional matrices of, e.g., channel x time x trials  
44 and channel x frequency x time x trials. Several neuroimaging packages are dedicated to the  
45 analyses of such large multidimensional data, often using linear methods. For instance, in the  
46 LIMO MEEG toolbox (Pernet et al., 2011), each channel, frequency, and time frame is analyzed  
47 independently using the general linear model, an approach referred to as mass-univariate  
48 analysis. Ordinary Least Squares (OLS) are used to find model parameters that minimize the error  
49 between the model and the data. For least squares estimates to have good statistical properties,  
50 it is however expected that the error covariance off-diagonals are zeros, such that  $\text{Cov}(e) = \sigma^2 I$ ,  $I$   
51 being the identity matrix (Christensen, 2002) assuming observations are independent and  
52 identically distributed. It is well established that deviations from that assumption lead to  
53 substantial power reduction and to an increase in the false-positive rate. When OLS assumptions  
54 are violated, robust techniques offer reliable solutions to restore power and control the false  
55 positive rate. Weighted Least Squares (WLS) is one such robust method that uses different  
56 weights across trials, such that  $\text{Cov}(e) = \sigma^2 V$ , with  $V$  a diagonal matrix:

$$57 \quad y = X\beta + e, \quad E(e) = 0, \quad \text{Cov}(e) = \sigma^2 V \quad \text{equation 1}$$

58  
59 with  $y$  a  $n$ -dimensional vector (number of trials),  $X$  the  $n \times p$  design matrix,  $\beta$  a  $p$  dimensional vector  
60 (number of predictors in  $X$ ) and  $e$  the error vector of dimension  $n$ . The WLS estimators can then  
61 be obtained using an OLS on transformed data (eq. 2 and 3):

$$62 \quad Wy = WX\beta + We, \quad E(e) = 0, \quad \text{Cov}(e) = \sigma^2 I \quad \text{equation 2}$$

$$63 \quad \hat{\beta} = (X^T WX)^{-1} X^T Wy \quad \text{equation 3}$$

64  
65 with  $W$  a  $1 \times n$  vector of weights.

66  
67  
68  
69 When applied to MEEG data, a standard mass-univariate WLS entails obtaining a weight for each  
70 trial but also each dimension analyzed, i.e. channels, frequencies and time frames. Following  
71 such procedure, a trial could be considered as an outlier or be assigned a low weight, for a single  
72 frequency or time frame, which is implausible given the well-known correlations of MEEG data  
73 over space, frequencies and time. We propose here that a single or a few consecutive data points  
74 should never be flagged as outliers or weighted down, and that a single weight per trial (and  
75 channel) should be derived instead, with weights taking into account the whole temporal or  
76 spectral profile. In the following, we demonstrate how the Principal Component Projection  
77 method (PCP - Filzmoser et al., 2008) can be used in this context, and how those weights can then  
78 be used in the context of the general linear model, applied here to event-related potentials.

79  
80

## 81 **Method**

82

### 83 *Trial-based Weighted Least Squares*

84

85 An illustration of the method is shown in figure 1. Trial weights are computed as a distance among  
86 trials projected onto the main ( $\geq 99\%$ ) principal components space. Here, the principal  
87 components computed over the  $f$  time frames are those directions which maximize the variance  
88 across trials for uncorrelated (orthogonal) time periods (figure 1B). Outlier trials are points in the  
89  $f$ -dimensional space which are far away from the bulk. By virtue of the PCA, these outlier trials  
90 become more visible along the principal component axes than in the original data space. Weights  
91 (figure 1E) for each trial are obtained using both the Euclidean norm (figure 1C, distance location)  
92 and the kurtosis weighted Euclidean norm (figure 1D, distance scatter) in this reduced PCA space  
93 (see Filzmoser et al., 2008 for details). We choose to exploit this simple technique because it is  
94 computationally fast given the rich dimensional space of EEG data and because it does not  
95 assume the data to originate from a particular distribution. The only constraint is that there are  
96 more trials present than time frames. For instance, with trials ranging from -50 ms to +650 ms,  
97 sampled at 250 Hz, the method requires at least 177 trials. The PCP algorithm is implemented in  
98 the *limo\_pcout.m* function, distributed with the LIMO MEEG toolbox ([https://limo-eeg-  
99 toolbox.github.io/limo\\_meeg/](https://limo-eeg-toolbox.github.io/limo_meeg/)). The WLS solution, implemented in *limo\_WLS.m*, consists of  
100 computing model beta estimates using weights from the PCP method on OLS standardized robust  
101 residuals, following three steps:

102

- 103 (1) After the OLS solution is computed, an adjustment is performed on residuals by  
104 multiplying them by  $1/\sqrt{1-h}$  where  $h$  is a vector of Leverage points (i.e. the diagonal of  
105 the hat matrix  $H = X(X'X)^{-1}X'$  where  $X$  is the design matrix). This adjustment is  
106 necessary because leverage points are the most influential on the regression space, i.e.  
107 they tend to have low residual values (Hoaglin & Welsch, 1978).
- 108 (2) Residuals are then standardized using a robust estimator of dispersion, the median  
109 absolute deviation to the median (MAD), and re-adjusted by the tuning function. Here we  
110 used the bisquare function. The result is a series of weights with high weights for data  
111 points having high residuals (with a correction for Leverage).
- 112 (3) The WLS solution is then computed following equation 3.

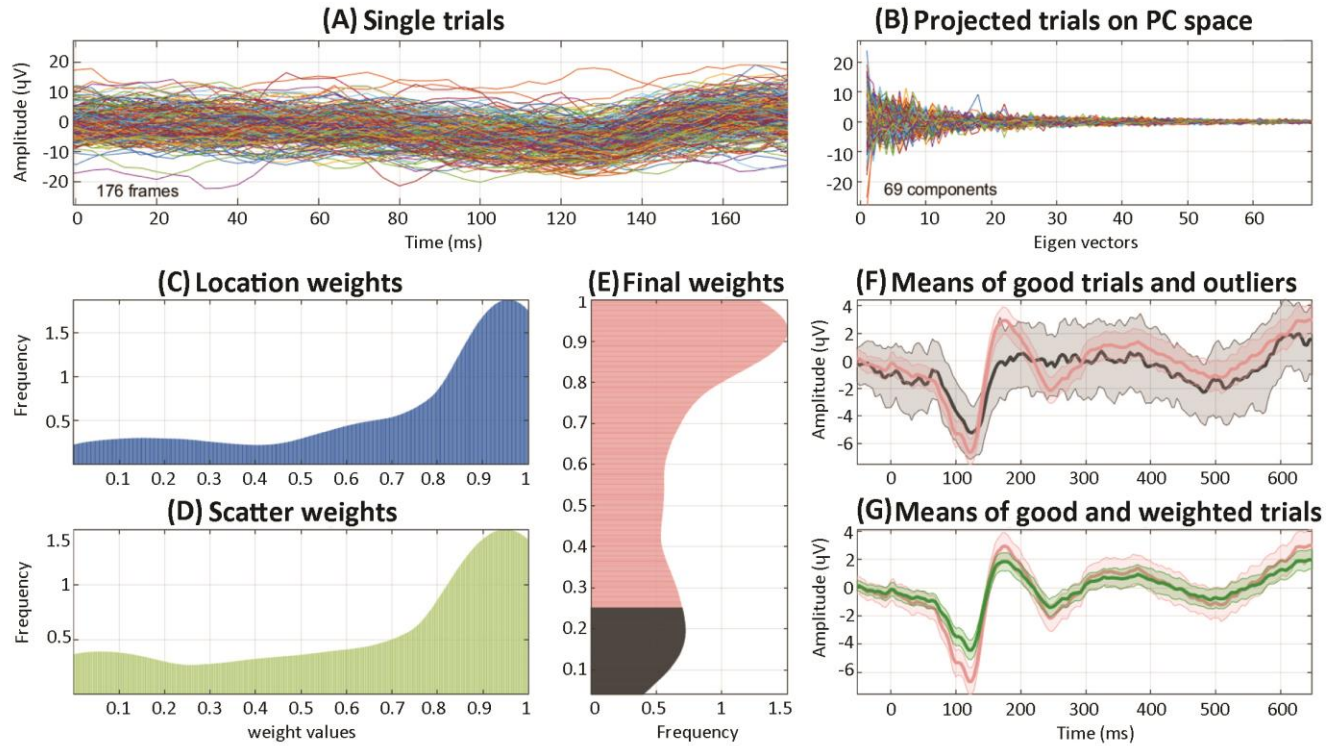

113  
114 *Figure 1. Illustration of the PCP weighting scheme using trials for ‘famous faces’ of the OpenNeuro.org*  
115 *publicly available ds002718 dataset in subject 3, channel 34 (see Section on empirical data analysis). Panel*  
116 *A shows the single-trial responses to all stimuli. The principal component analysis is computed over time,*  
117 *keeping the components explaining the most variance and summing to at least 99% of explained variance*  
118 *(giving here 69 eigenvectors i.e. ‘independent time components’ from the initial 176 time points) and the*  
119 *data are projected onto those axes (panel B). From the projected data onto the components, Euclidean*  
120 *distances for location and scatter are computed (panels C, D - showing smooth histograms of weights) and*  
121 *combined to obtain a distance for each trial. That distance is either used as weights in a linear model or*  
122 *used to determine outliers (panel E, with outliers identified for weights below  $\sim 0.27$ , shown in dark grey).*  
123 *At the bottom right, the mean ERP for trials classified as good (red) vs. outliers (black) and the weighted*  
124 *mean (green) are shown (panels F and G). Shaded areas indicate the 95% highest-density percentile*  
125 *bootstrap intervals.*

126 *Simulation-based analyses*

127

128 *A. Outliers detection and parameters estimation.*

129

130 Simulated ERPs were generated to evaluate the classification accuracy of the PCP method and  
131 estimate the robustness to outliers and low signal-to-noise ratio of the WLS solution in  
132 comparison to an OLS solution and a standard Iterative Reweighted Least Squares (IRLS) solution  
133 which minimizes residuals at each time frame separately (implemented in *limo\_IRLS.m*). To do  
134 so, we manipulated (i) the percentage of outliers (how robust is the method), testing for 10%,  
135 20%, 30%, 40% or 50% of outliers; (ii) the signal to noise ratio (defined relative to the mean over  
136 time of the background activity); and (iii) the type of outliers. The first set of outliers were defined  
137 based on the added noise: white noise, pink noise, alpha oscillations and gamma oscillations. In  
138 these cases, the noise started with the P1 component and lasted ~ 200ms (see below). The  
139 second set of outliers were defined based on their amplitude, or outlier to signal ratio (0.5, 0.8,  
140 1.2, and 1.5 times the 'true' N1 amplitude).

141

142 Synthetic data were generated for one channel, using the model developed by (Yeung et al.,  
143 2018). The simulated signal corresponded to an event-related potential with P1 and N1  
144 components (100 ms long) added to background activity with the same power spectrum as  
145 human EEG, generating 200 trials of 500 ms duration with a 250 Hz sampling rate. Examples for  
146 each type of simulation are shown in figure 2 and results are based, for each case, on a thousand  
147 random repetitions. Performance of the PCP algorithm at detecting outlying synthetic EEG trials  
148 was investigated by computing the confusion matrix and mapping the true and false positives  
149 rates in the Receiver Operating space, and by computing the Matthew Correlation Coefficients  
150 (MCC). Robustness was examined by computing the Pearson correlations and the Kolmorov-  
151 Smirnov (KS) distances between the ground truth mean and the OLS, WLS, and IRLS means.  
152 Pearson values allowed to estimate the linear relationships between estimated means and the  
153 truth while KS distances provide a fuller picture of the overall differences in distributions. The  
154 code used to generate the ERP and the results are available at [https://github.com/LIMO-EEG-  
155 Toolbox/limo\\_test\\_stats/tree/master/PCP\\_simulations](https://github.com/LIMO-EEG-Toolbox/limo_test_stats/tree/master/PCP_simulations).

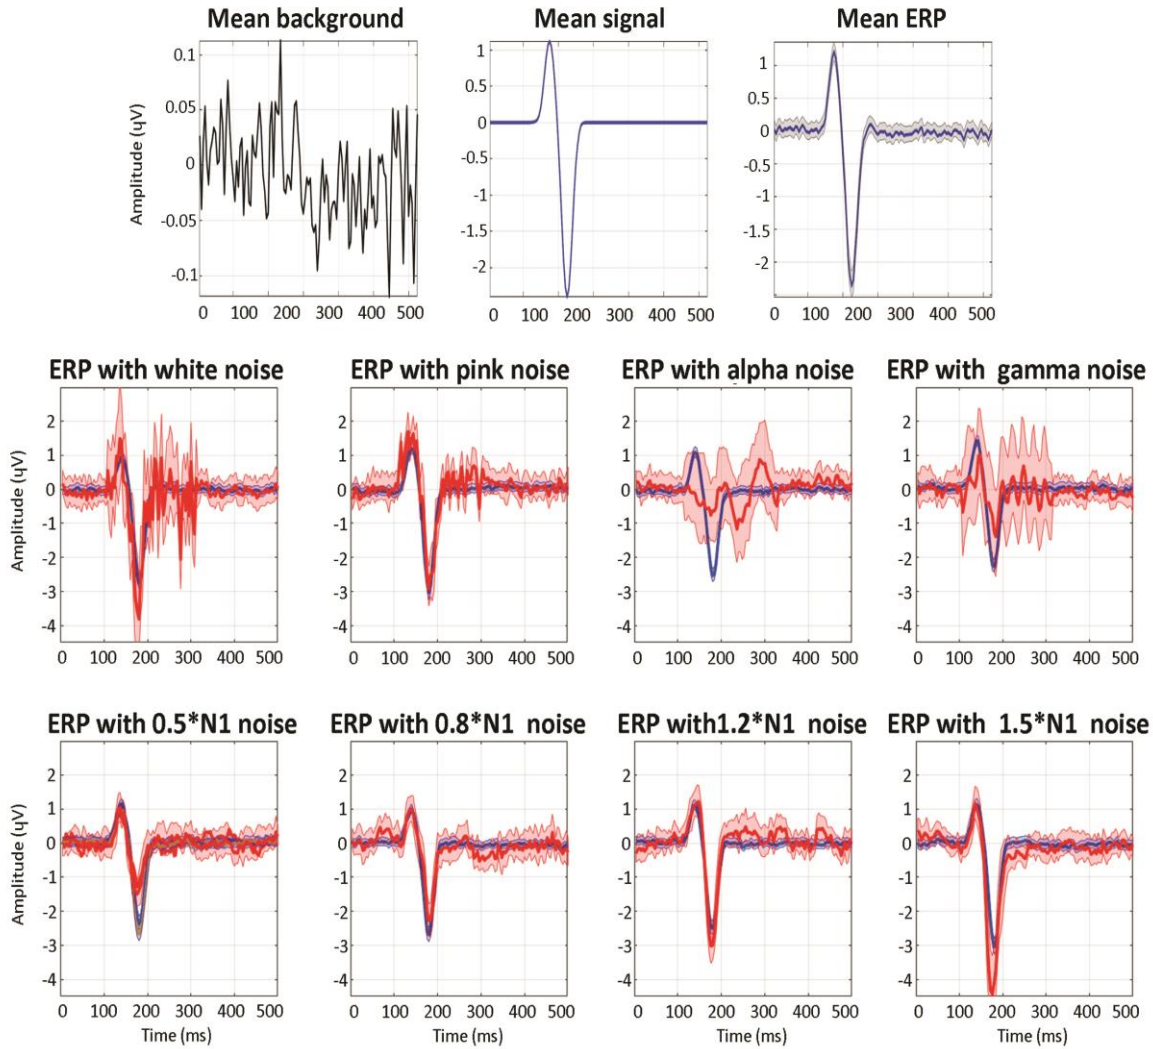

156  
 157 *Figure 2. Illustration of simulated ERP ground truth with the different types of outlier trials. At the top is*  
 158 *shown the mean background, mean signal and resulting generated ERP with it's 95% confidence intervals.*  
 159 *In each subsequent subplot is shown the mean ERP ground truth from 160 trials with their 95% confidence*  
 160 *intervals (blue) with a SNR of 1. The first row shows the mean ERP from outlier trials generated by adding*  
 161 *white noise, pink noise, alpha or gamma oscillations; the second row shows the mean ERP from outlier*  
 162 *trials generated with variable Outlier to Signal Ratio (OSR) on the N1 component.*

163

### 164 *B. Statistical inference.*

165

166 Accurate estimation of model parameters (i.e. beta estimates in the GLM - equation 3) is  
 167 particularly important because it impacts group-level results. Inference at the single-subject level  
 168 may, however, also be performed and accurate p-values need, therefore, to be derived. Here,  
 169 error degrees of freedom are obtained using the Satterwaithe approximation (equation 4).

170

$$171 \text{dfe} = \text{tr}([I - H]^T [I - H]) \quad \text{equation 4}$$

172

173 *with dfe the degree of freedom of the error, I the identity matrix and H the hat matrix*

174 To validate p-values, simulations under the null were performed. Two types of data were  
175 generated: Gaussian data of size 120 trials x 100 time frames and EEG data of size 120 trials x 100  
176 time frames with a P1 and N1 component as above, added to coloured background activity with  
177 the same power spectrum as human EEG. In each case, a regression (1 Gaussian random  
178 variable), an ANOVA (3 conditions of 40 trials - dummy coding) and an ANCOVA (3 conditions of  
179 40 trials and 1 Gaussian random covariate) model were fitted to the data using the OLS, WLS and  
180 IRLS methods. The procedure was performed 10,000 times, leading to 1 million p-values per  
181 data/model/method combination and Type 1 errors with binomial confidence intervals were  
182 computed.

183

### 184 *Empirical data analysis*

185

186 A second set of analyses used the publicly available multimodal face dataset (Wakeman &  
187 Henson, 2016) to (i) investigate the PCP classification; (ii) validate the GLM implementation for  
188 type 1 error family-wise control at the subject level; (iii) evaluate group results, contrasting WLS  
189 against the OLS and IRLS methods. This analysis can be reproduced using the script  
190 @[https://github.com/LIMO-EEG-  
191 Toolbox/limo\\_meeg/blob/master/resources/code/Method\\_validation.m](https://github.com/LIMO-EEG-Toolbox/limo_meeg/blob/master/resources/code/Method_validation.m)

192

#### 193 *A. EEG Data and Preprocessing*

194

195 The experiment consisted in the presentation of familiar, unfamiliar, and scrambled faces,  
196 repeated twice at various intervals, leading to a factorial 3 (type of faces) by 3 (repetition) design.  
197 The procedure followed (Pernet et al., 2021). EEG data were extracted from the MEG fif files,  
198 time corrected and electrode position re-oriented and saved according to EEG-BIDS (Pernet et  
199 al., 2019 - available at [OpenNeuro 10.18112/openneuro.ds002718.v1.0.2](https://openneuro.org/datasets/10.18112/openneuro.ds002718.v1.0.2)). Data were imported  
200 into EEGLAB (Delorme & Makeig, 2004) using *the bids-matlab-tools v5.2 plug-in* and non-EEG  
201 channel types were removed. Bad channels were next automatically removed and data filtered  
202 at 0.5Hz using *pop\_clean\_rawdata.m* of the *clean\_radata* plugin v2.2 (transition band [0.25 0.75],  
203 bad channel defined as a flat line of at least 5sec and with a correlation to their robust estimate  
204 based on other channels below 0.8). Data were then re-referenced to the average (*pop\_reref.m*)  
205 and submitted to an independent component analysis (Onton et al., 2006) (*pop\_runica.m* using  
206 the *runica* algorithm sphering data by the number of channels -1). Each component was  
207 automatically labelled using the *ICLabel* v1.2.6 plug-in (Pion-Tonachini et al., 2019), rejecting  
208 components labeled as eye movements and muscle activity above 80% probability. Epochs were  
209 further cleaned if their power deviated too much from the rest of the data using the Artifact  
210 Subspace Reconstruction algorithm (Kothe & Makeig, 2013) (*pop\_clean\_rawdata.m*, burst  
211 criterion set to 20).

212

#### 213 *B. High vs. low weight trials and parameters estimation.*

214

215 At the subject level, ERP were modelled at each channel and time frame with the 9 conditions  
216 (type of faces x repetition) and beta parameter estimates obtained using OLS, WLS, and IRLS. For  
217 each subject, high vs. low weight trials were compared with each other at the channel showing

218 the highest between trials variance to investigate what ERP features drove the weighting  
219 schemes. High and low trials were defined a priori as trials with weights (or mean weights for  
220 IRLS) below the first decile or above the 9th decile. We used two samples bootstrap-t on 20%  
221 trimmed means to compare these quantities in high and low trials in every participant: temporal  
222 SNR (the standard deviation over time); global power (mean of squared absolute values,  
223 Parseval's theorem); autocorrelation (distance between the 2 first peaks of the power spectrum  
224 density, Wiener-Khinchin theorem). A similar analysis was conducted at the group level averaging  
225 across trials metrics. Computations of these three quantities have been automatized for LIMO  
226 MEEG v3.0 in the *limo\_trialmetric.m* function.

227

### 228 *C. Statistical inference.*

229

230 In mass-univariate analyses, once p-values are obtained, the family-wise type 1 error rate can be  
231 controlled using the distribution of maxima statistics from data generated under the null  
232 hypothesis (Pernet et al., 2015). Here, null distributions were obtained by first centering data per  
233 conditions, i.e. the mean is subtracted from the trials in each condition, such that these  
234 distributions had a mean of zero, but the shape of the distributions is unaffected. We then  
235 bootstrap these centred distributions (by sampling with the replacement), keeping constant the  
236 weights (since they are variance stabilizers) and the design. We computed 2,500 bootstrap  
237 estimates per subject. A thousand of these bootstrap estimates were used to compute the family-  
238 wise type 1 error rate (FWER), while maxima and cluster maxima distributions were estimated  
239 using the from 500 to 1,500 bootstraps estimates from the remaining set (e.g. use 500 estimates  
240 to build the null distribution of maxima, and test FWER using 1000 draws, redo the analysis with  
241 600 estimates to build the null distribution of maxima, and test FWER using again the 1000  
242 independent draws, etc). This allowed analysing the convergence rate, i.e. how many resamples  
243 are needed to control the FWER. Since OLS was already validated in Pernet et al. (2015), here we  
244 present WLS results. Statistical validations presented here and other statistical tests  
245 implemented in the LIMO MEG toolbox v3.0 (GLM validation, robust tests, etc.) are all available  
246 at [https://github.com/LIMO-EEG-Toolbox/limo\\_test\\_stats/wiki](https://github.com/LIMO-EEG-Toolbox/limo_test_stats/wiki).

247

### 248 *D. Performance evaluation at the group level.*

249

250 At the group level, we computed 3 by 3 repeated measures ANOVA (Hotelling  $T^2$  tests)  
251 separately on OLS, WLS, and IRLS estimates, with the type of faces and repetition as factors.  
252 Results are reported using both a correction for multiple comparisons with cluster-mass and with  
253 TFCE (threshold-free cluster enhancement) at  $p < .05$  (Maris, E. & Oostenveld, R., 2007; C.R. Pernet  
254 et al., 2015).

255

256 In addition to these thresholded maps, distributions were compared to further understand where  
257 differences originated from. First, we compared raw effect sizes (Hotelling  $T^2$ ) median  
258 differences between WLS vs. OLS and WLS vs. IRLS for each effect (face, repetition and  
259 interaction), using a percentile t-test with  $\alpha$  adjusted across all 6 tests using the Hochberg  
260 step-up procedure. This allowed checking if differences in results were due to effect size  
261 differences. Then, since multiple comparison correction methods are driven by the data



262 structure, we compared the shapes of the F value and of the TFCE value distributions (tfce  
263 reflecting clustering). Each distribution was standardized (equation 5) and WLS vs. OLS and WLS  
264 vs. IRLS distributions compared using shift function analyses (Rousselet et al., 2017).

265

$$266 \quad Y_{zi} = \frac{(Y_i - \text{median}(Y))}{\sqrt{(p_i/2) * \text{MAD}(Y)}} \quad \text{equation 5}$$

267

268 *with Yzi the standardized data, Y the data, and MAD the median absolute deviation*

269

## 270 **Results**

271

### 272 *Outliers detection*

273

274 While the PCP method is used in the GLM to obtain weights and not to remove outliers directly,  
275 simulations allowed to better understand what kind of trials are weighted down and how good  
276 the method is at detecting such trials. Figure 3 shows all the results for ERP simulated with a SNR  
277 of 1. Similar results were observed when using a SNR of 2 (supplementary figure 1). First and  
278 foremost, in all cases and for up to 40% of outlying trials, the PCP data are located in the upper  
279 left corner of the ROC space, indicating good performances. When reaching 50% of outliers, the  
280 true positive rate falls down to ~40% and the false positive rate remains below 40%. This is best  
281 appreciated by looking at the plots showing perfect control over false positives when data are  
282 contaminated with up to 40% of white, alpha, and gamma outliers. For those cases, the Matthew  
283 Correlation Coefficients also remain high (>0.6) although not perfect (not =1), indicating some  
284 false negatives. Compared with other types of noise, pink noise elicited very different results,  
285 with Matthew Correlation Coefficients around 0 indicating chance classification level. Results  
286 from amplitude outliers also show Matthew Correlation Coefficients close to 0 with a linear  
287 increase in false positives and linear decrease in false positives as the percentage of outliers  
288 increases, i.e., the PCP method did not detect amplitude changes around peaks. These results are  
289 simply explained by the principal components being computed over time frames, and outliers  
290 with pink noise and weaker or stronger N1 do not show different 'directions' (eigen vectors) in  
291 this dimension when decomposing the covariance matrix, i.e. their temporal profiles do not differ  
292 from the ground truth.

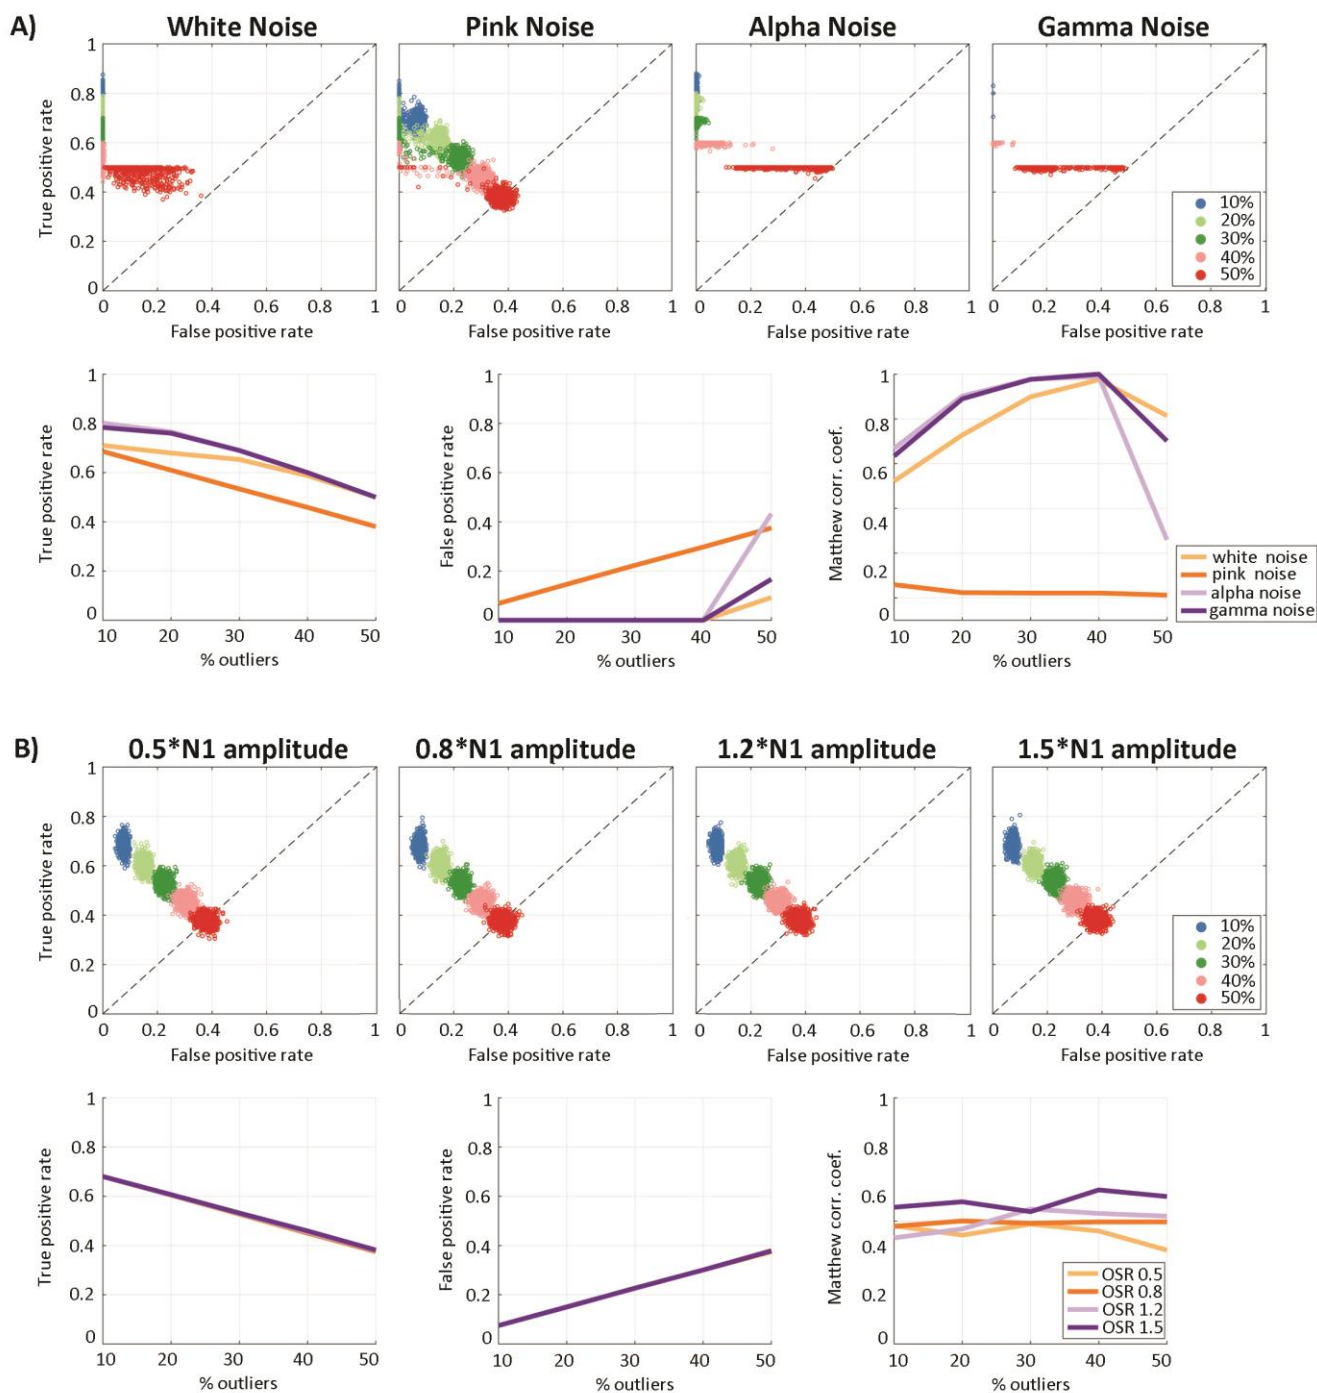

293  
 294 *Figure 3. PCP performance at detecting outlying trials with a SNR of 1. (A) Results for outliers affected by*  
 295 *white noise, pink noise, alpha, and gamma oscillations. (B) Results for trials affected by amplitude changes*  
 296 *over the N1 component (0.5, 0.8, 1.2, 1.5 times the N1). The scatter plots map the Receiver Operating*  
 297 *Characteristic Space (False Positive rate vs. True Positive rate); the curves display, from left to right, the*  
 298 *median True Positive rate, False Positive rate, and Matthew Correlation Coefficients.*

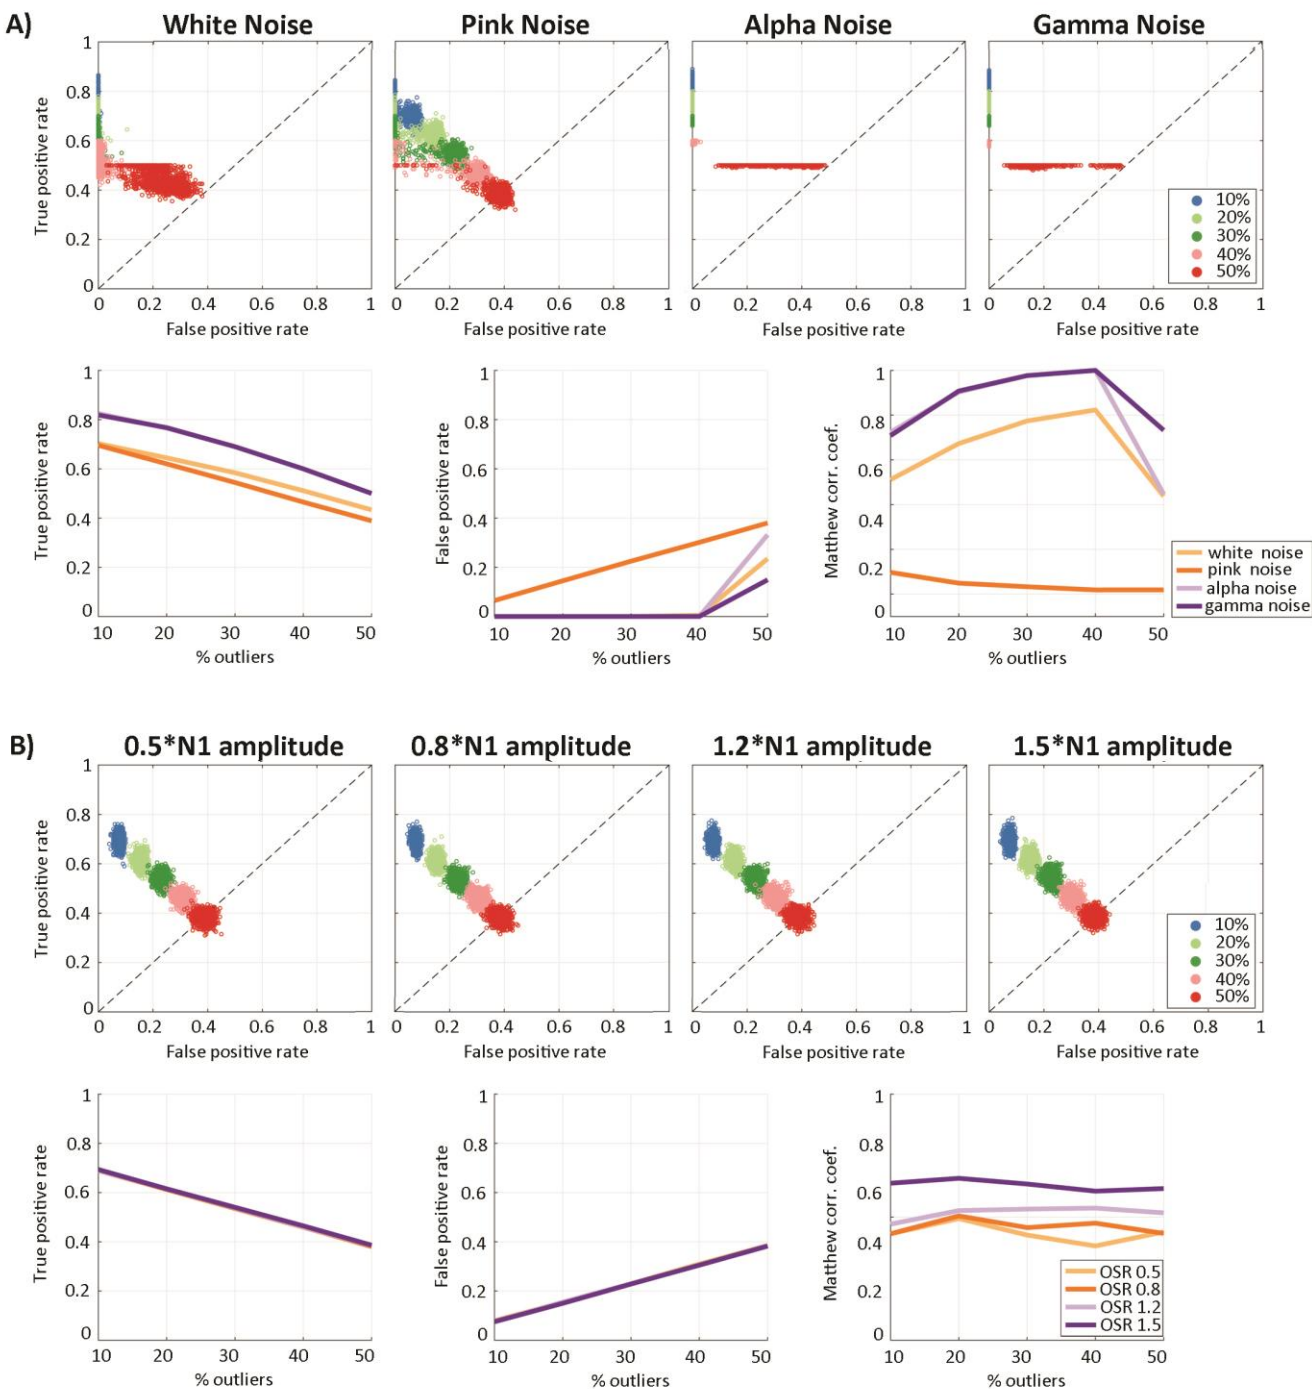

299  
 300 *Supplementary Figure 1. PCP performance at detecting outlying trials with a SNR of 2. (A) Results for*  
 301 *outliers affected by white noise, pink noise, alpha, and gamma oscillations. (B) Results for trials affected*  
 302 *by amplitude changes over the N1 component (0.5, 0.8, 1.2, 1.5 times the N1). The scatter plots map the*  
 303 *Receiver Operating Characteristic Space (False Positive rate vs. True Positive rate); the curves display, from*  
 304 *left to right, the median True Positive rate, False Positive rate, and Matthew Correlation Coefficients.*  
 305

306 *High vs. low trial weights*

307  
 308 The classification for real ERP data confirmed results observed with simulations: the PCP  
 309 algorithm weighted down trials with different dynamics from the bulk. Single subject analyses  
 310 (supplementary table 1) and group analyses (figure 4) for WLS showed that trials with a low  
 311 weight are less smooth than trials with a high weight (higher temporal variance  $\sim 10$  vs.  $7.26\mu\text{V}$   
 312 and power  $\sim 131$  vs.  $69\text{dB}$ , lower autocorrelation  $11$  vs.  $12.25\text{ms}$ ), despite having similar spectra  
 313 (as expected from data filtering and artefact reduction). In comparison, trials with low and high  
 314 mean weight based on IRLS, were similar on those metrics (temporal variance  $\sim 9$  vs.  $7\mu\text{V}$ , and  
 315 power  $\sim 126$  vs.  $65\text{dB}$ , autocorrelation  $12.25$  vs.  $12\text{ms}$ ). While 11 out of 18 subjects show  
 316 maximum between-trial variance on the same channels for WLS and IRLS, only 28% of low weight  
 317 trials were the same vs. 56% of high weight trial, further indicating that the weighting scheme  
 318 from WLS does not reflect amplitude variations only, as does IRLS.

319  
 320

|            | <i>tSNR difference (<math>\mu\text{V}</math>)</i> |                      | <i>Power difference (dB)</i> |                   | <i>autocorrelation difference (ms)</i> |                      |
|------------|---------------------------------------------------|----------------------|------------------------------|-------------------|----------------------------------------|----------------------|
|            | <i>WLS</i>                                        | <i>IRLS</i>          | <i>WLS</i>                   | <i>IRLS</i>       | <i>WLS</i>                             | <i>IRLS</i>          |
| <i>s2</i>  | <i>[-0.03 0.54]</i>                               | <i>[0.26 1.14]</i>   | <i>[-2 6]</i>                | <i>[3 18]</i>     | <i>[-8.5 1.8]</i>                      | <i>[5.09 16.4]</i>   |
| <i>s3</i>  | <i>[2.35 2.92]</i>                                | <i>[-4.48 -2.34]</i> | <i>[35 50]</i>               | <i>[-55 -22]</i>  | <i>[-3.9 3.5]</i>                      | <i>[16.6 45.9]</i>   |
| <i>s4</i>  | <i>[0.14 0.69]</i>                                | <i>[1.9 3.43]</i>    | <i>[1 13]</i>                | <i>[39 64]</i>    | <i>[-13 -6.7]</i>                      | <i>[-12.8 3.2]</i>   |
| <i>s5</i>  | <i>[4.03 8.25]</i>                                | <i>[10.7 13.57]</i>  | <i>[77 200]</i>              | <i>[297 382]</i>  | <i>[-13 -4.7]</i>                      | <i>[-14.6 -4.9]</i>  |
| <i>s6</i>  | <i>[1.51 2.87]</i>                                | <i>[-0.74 1.98]</i>  | <i>[24 48]</i>               | <i>[-6 33]</i>    | <i>[-4.8 -0.39]</i>                    | <i>[-0.6 17.8]</i>   |
| <i>s7</i>  | <i>[1.16 5.1]</i>                                 | <i>[2.44 5.26]</i>   | <i>[38 141]</i>              | <i>[54 129]</i>   | <i>[-4 11.1]</i>                       | <i>[-7.3 11.2]</i>   |
| <i>s8</i>  | <i>[7.49 8.21]</i>                                | <i>[7.57 8.55]</i>   | <i>[154 173]</i>             | <i>[159 183]</i>  | <i>[-24 -19.8]</i>                     | <i>[-20.2 -14.1]</i> |
| <i>s9</i>  | <i>[2.97 7.96]</i>                                | <i>[-4.55 0.44]</i>  | <i>[52 169]</i>              | <i>[-74 28]</i>   | <i>[-16 -7.1]</i>                      | <i>[-1.5 7.1]</i>    |
| <i>s10</i> | <i>[-0.61 0.9]</i>                                | <i>[-3.47 2.27]</i>  | <i>[-11 11]</i>              | <i>[-107 102]</i> | <i>[0.9 9.1]</i>                       | <i>[-0.2 1.5]</i>    |
| <i>s11</i> | <i>[-0.73 4.46]</i>                               | <i>[4.57 7.27]</i>   | <i>[-11 168]</i>             | <i>[123 200]</i>  | <i>[-2.9 1.4]</i>                      | <i>[0 7.8]</i>       |
| <i>s12</i> | <i>[6.69 11.17]</i>                               | <i>[-2.06 4.85]</i>  | <i>[149 250]</i>             | <i>[-98 93]</i>   | <i>[-31 -22]</i>                       | <i>[-13.1 -2.7]</i>  |
| <i>s13</i> | <i>[-5.06 0.1]</i>                                | <i>[-6.8 2.91]</i>   | <i>[-222 2]</i>              | <i>[-285 142]</i> | <i>[4.4 12]</i>                        | <i>[-6.2 0.19]</i>   |
| <i>s14</i> | <i>[4.81 7.63]</i>                                | <i>[3.54 7.77]</i>   | <i>[174 270]</i>             | <i>[123 270]</i>  | <i>[-0.4 24]</i>                       | <i>[-6.9 13.3]</i>   |
| <i>s15</i> | <i>[1.69 3.91]</i>                                | <i>[-0.97 2.06]</i>  | <i>[36 93]</i>               | <i>[-20 51]</i>   | <i>[-6.5 1.1]</i>                      | <i>[1.8 10.5]</i>    |
| <i>s16</i> | <i>[-6.85 8.4]</i>                                | <i>[-2.13 13.82]</i> | <i>[-164 300]</i>            | <i>[-65 444]</i>  | <i>[-8.3 8.7]</i>                      | <i>[-16 14.1]</i>    |
| <i>s17</i> | <i>[2.34 3.72]</i>                                | <i>[2.31 4.09]</i>   | <i>[34 68]</i>               | <i>[45 83]</i>    | <i>[-29.4 -15.9]</i>                   | <i>[-13.8 2.4]</i>   |

|     |              |              |         |         |               |              |
|-----|--------------|--------------|---------|---------|---------------|--------------|
| s18 | [0.54 1.28]  | [-0.64 1.86] | [6 20]  | [-3 27] | [-15.7 -2.43] | [-28.8 11.4] |
| s19 | [-0.39 0.71] | [-0.40 0.57] | [-8 16] | [-9 17] | [-6.9 -1.3]   | [-7.1 -1.5]  |

321 *Supplementary Table 1. Subjects 95% percentile bootstrap confidence intervals of differences between*  
 322 *high and low trials trimmed means obtained using PCP-WLS or IRLS at channels with the highest between*  
 323 *trials variance. Intervals which do not include 0 (i.e., the difference between high vs. low trials is statistically*  
 324 *significant) are shown on gray background.*  
 325

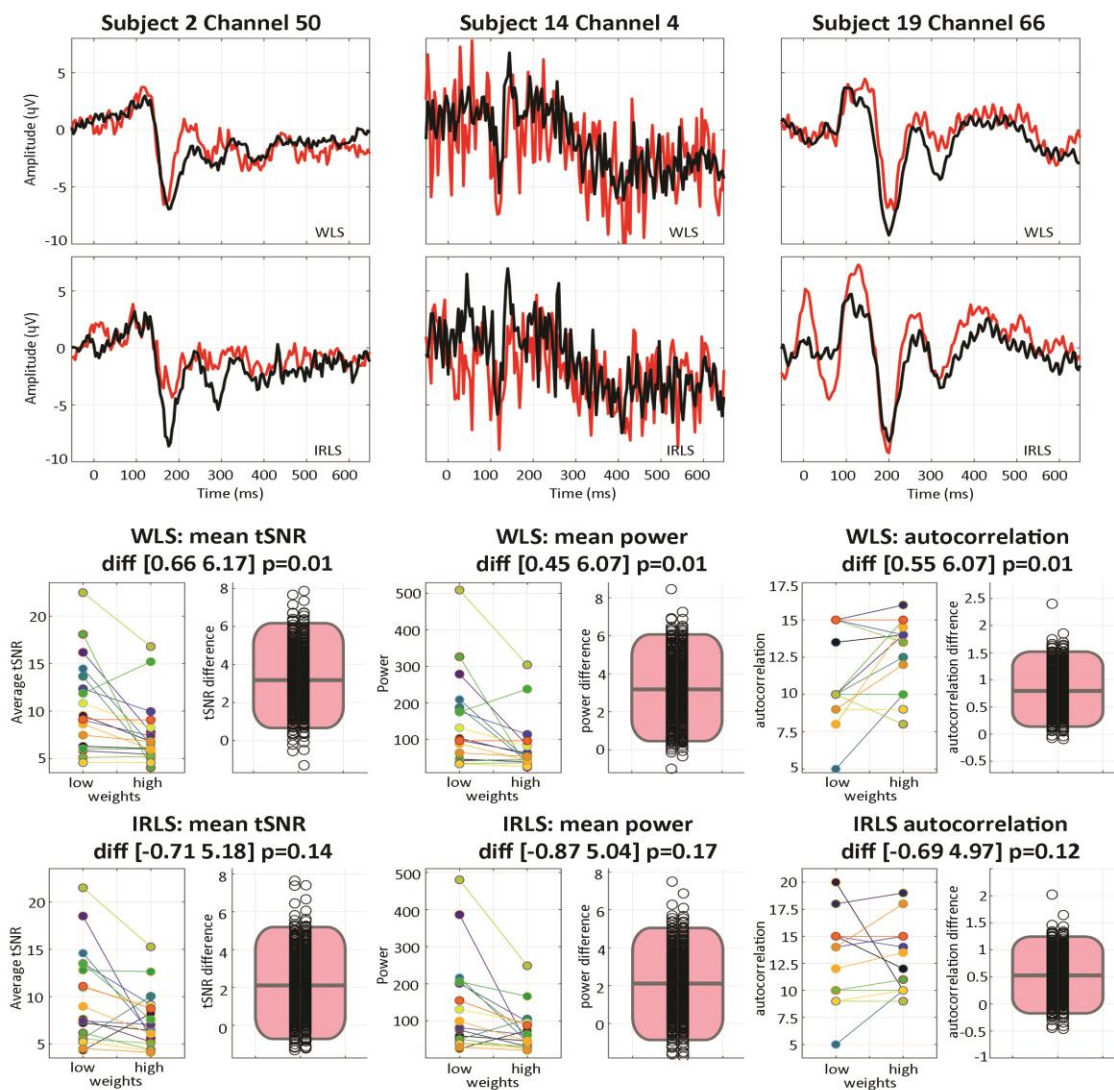

326  
 327 *Figure 4. Face ERPs computed using low and high weight trials. The top of the figure displays the mean of*  
 328 *low weight (red) and high weight (black) trials over right posterior temporal (subject 2, channel 50), left*  
 329 *frontal (subject 14 channel 4), and left posterior central (subject 19, channel 66) areas obtained either with*  
 330 *the PCP-WLS or the IRLS methods - as illustration of differences in tSNR, power, and autocorrelation. The*  
 331 *bottom of the figure displays single subject mean tSNR, power and autocorrelation (scatter plots) along*  
 332 *with the percentile bootstrap difference between low and high weight trials (black circles data points are*  
 333 *the bootstrap trimmed mean differences and the pink rectangles show the 20% trimmed mean and 95%*  
 334 *confidence intervals).*

335 *Estimation and Robustness*

336

337 The effect of adding outliers on the mean can be seen in figure 5 and supplementary figure 2.  
338 The standard mean, i.e. the ordinary least squares ERPs, shows an almost linear decrease in  
339 Pearson correlations and linear increase in KS distances to the ground truth as the percentage of  
340 outlier increases, an expected behaviour since OLS are not robust. Our reference robust  
341 approach, IRLS, shows robustness to white noise, alpha, and gamma oscillations with higher  
342 Pearson correlations than the OLS. Yet it performed worse than the OLS with pink noise and  
343 amplitude outliers showing lower correlations with the ground truth, despite having similar KS  
344 distances for all cases. As the IRLS solution for pink noise and amplitude outliers weights data to  
345 minimize residuals at each time point separately, these are also expected results, resulting in an  
346 average distance (over time) larger than OLS. The new WLS approach showed stronger resistance  
347 to outliers for white noise, alpha and gamma oscillations than the IRLS approach, with higher  
348 Pearson correlations. For pink noise and N1 amplitude outliers, it performs as the IRLS, despite  
349 different KS distances. The IRLS algorithm attenuates the influence of those data points that differ  
350 from the ground truth, but this may be from different trials at different time points. By doing so,  
351 KS distances to the ground truth were similar or lower (for alpha and gamma oscillations) than  
352 the OLS. The WLS approach attenuates the influence of trials with different time courses and  
353 thus, the WLS ERP mean is affected at every time point, even if the detection concerns a small  
354 part of the time course, leading to higher KS distances even with a small number of outliers.  
355 Conversely, the WLS ERP gets closer to the ground truth when the number of outliers is high  
356 (white noise, apha, gamma oscillations up to 40%) or stay constant independently of the number  
357 of outliers (pink noise, N1 amplitude outliers).

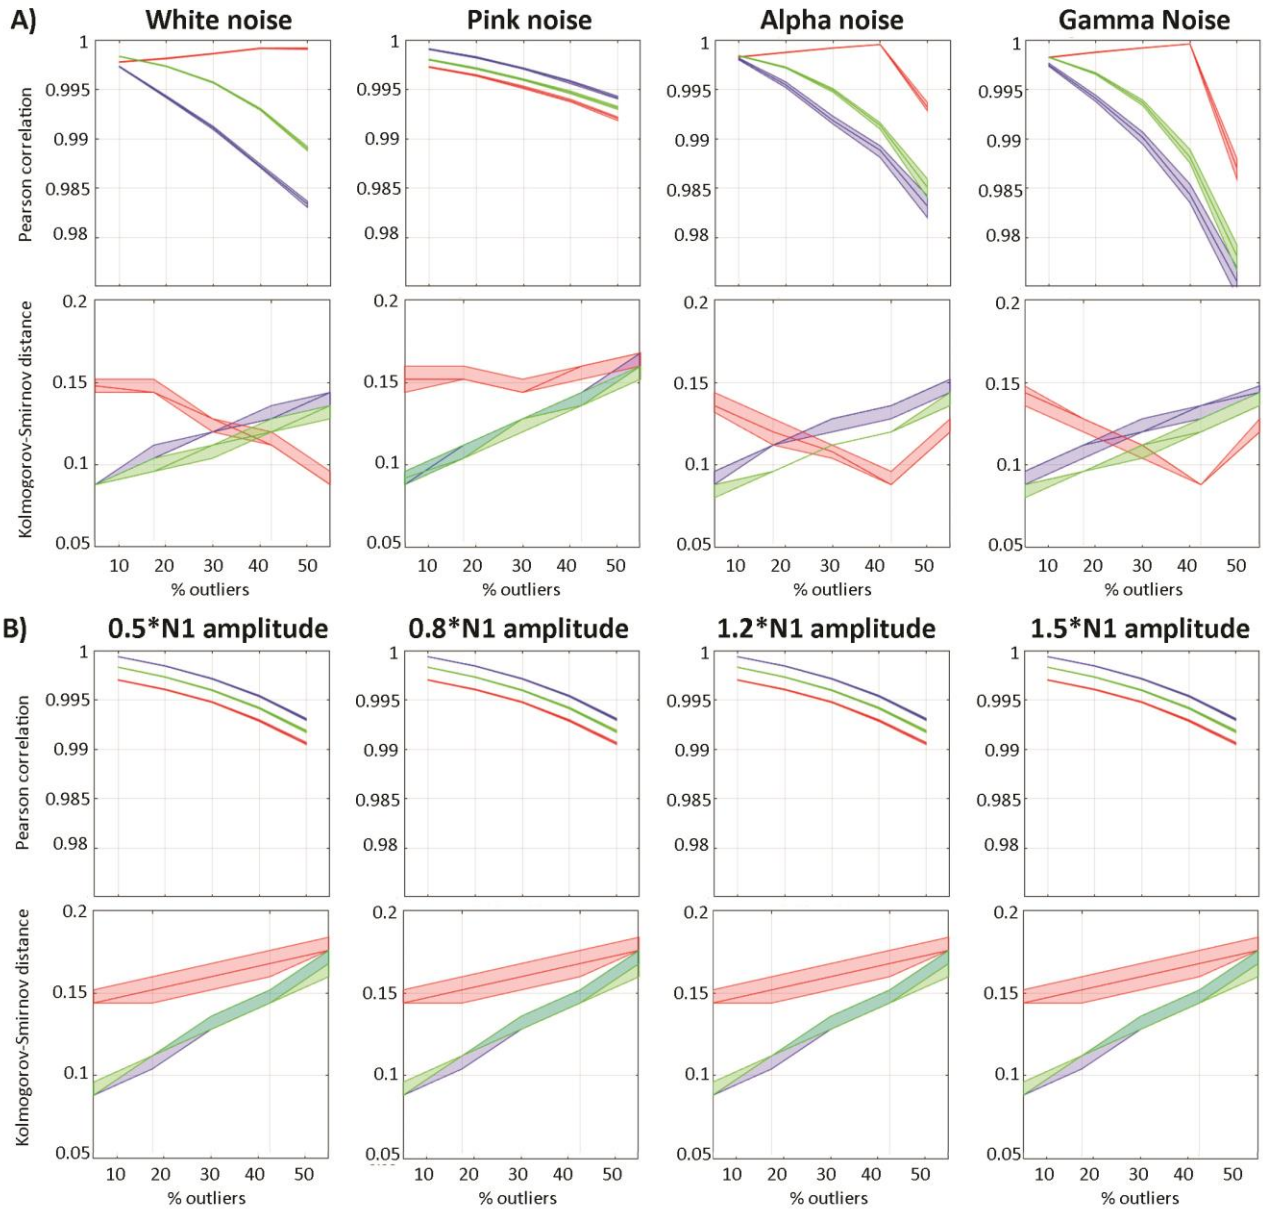

358  
 359 *Figure 5. Robustness of the PCP method to outlying trials with a SNR of 1. The upper part of the figure*  
 360 *shows median and 95% CI results for outliers affected by white noise, pink noise, alpha and gamma*  
 361 *oscillations and the bottom part shows results for trials affected by amplitude changes over the N1*  
 362 *component (0.5, 0.8, 1.2, 1.5 times the N1). Mean Pearson correlations indicate how similar the*  
 363 *reconstructed means (OLS in blue, IRLS in green, WLS in red) are to the ground truth, while mean*  
 364 *Kolmogorov-Smitnov distances indicate how much the overall distribution of values differ from the ground*  
 365 *truth.*

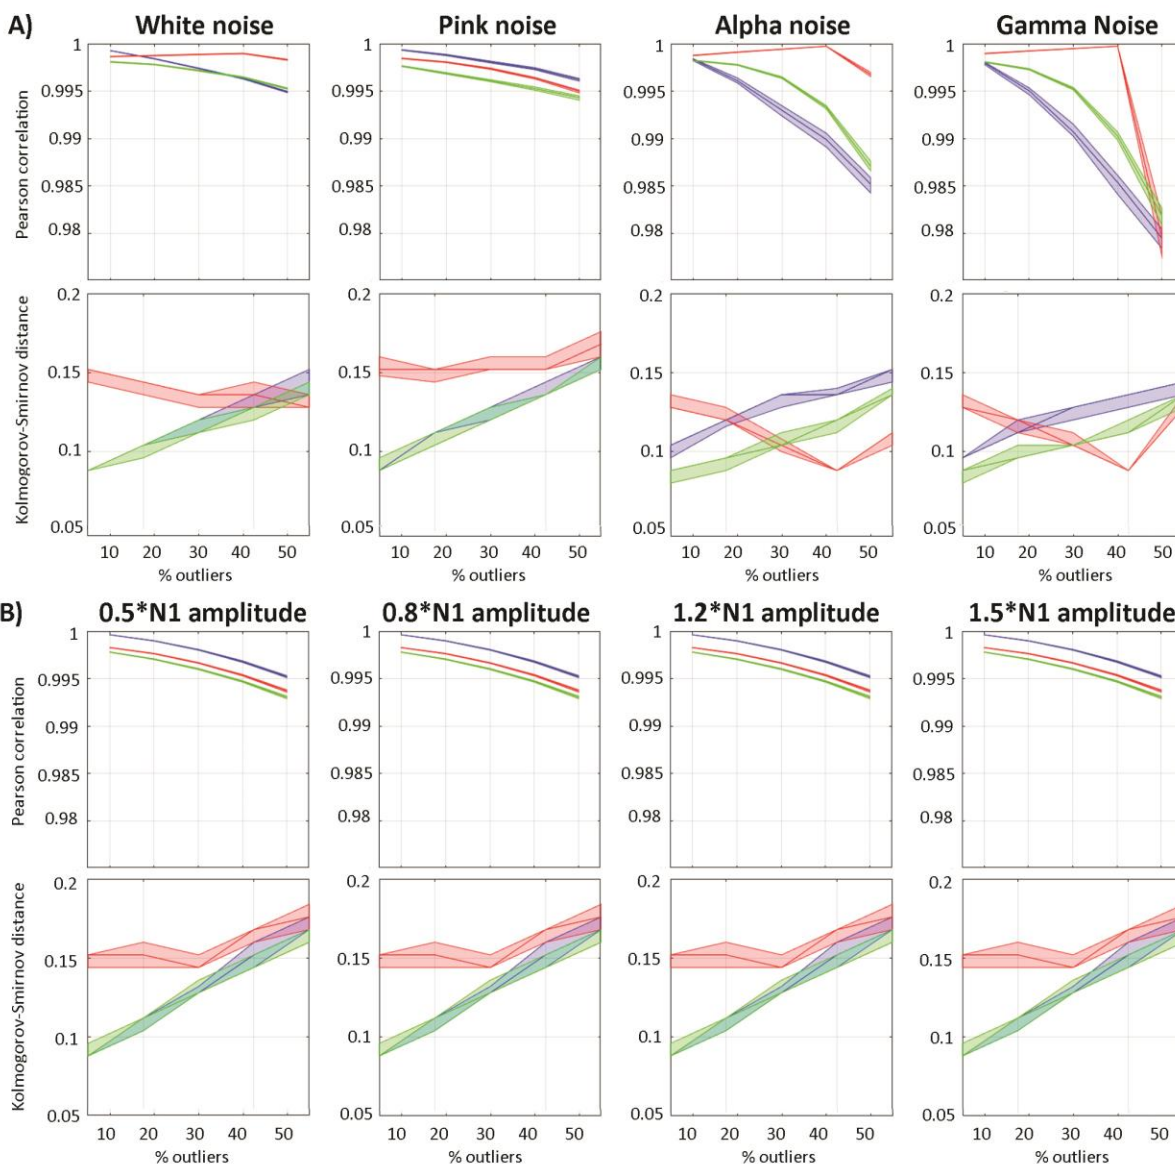

366  
 367 *Supplementary figure 2. Robustness of the PCP method to outlying trials with a SNR of 2. The upper part*  
 368 *of the figure shows median and 95% CI results for outliers affected by white noise, pink noise, alpha and*  
 369 *gamma oscillations and the bottom part shows results for trials affected by amplitude changes over the*  
 370 *N1 component (0.5, 0.8, 1.2, 1.5 times the N1). Mean Pearson correlations indicate how similar the*  
 371 *reconstructed means (OLS in blue, IRLS in green, WLS in red) are to the ground truth, while mean*  
 372 *Kolmogorov-Smitnov distances indicate how much the overall distribution of values differ from the ground*  
 373 *truth.*

374  
 375 *Statistical inference for single subjects*

376  
 377 The average type 1 error rate for every channel and time frame tested with simulated data is at  
 378 the nominal level (5%) for OLS. Results also show that IRLS are a little lenient, with small but  
 379 significantly smaller p-values than expected, leading to an error rate of  $\sim 0.055$ . Conversely, WLS



380 are conservative for simulated ERP, with p-values slightly too high, giving a type 1 error rate of  
 381  $\sim 0.04$ ) and lenient with purely Gaussian data (type 1 error  $\sim 0.065$  – table 1). This behaviour of  
 382 WLS is caused by the PCP method which optimizes weights based on distances across time,  
 383 except that with simulated Gaussian data there is no autocorrelation and the PCA returns a much  
 384 higher number of dimensions, leading to a meaningless feature reduction and thus meaningless  
 385 trial distances and weights.  
 386

|                  |      | Null Gaussian   | Null ERP        |
|------------------|------|-----------------|-----------------|
| Regression       | OLS  | [0.0495 0.0503] | [0.0498 0.0507] |
|                  | WLS  | [0.0636 0.0645] | [0.0400 0.0408] |
|                  | IRLS | [0.0555 0.0564] | [0.0527 0.0536] |
| ANOVA            | OLS  | [0.0493 0.0502] | [0.0493 0.0501] |
|                  | WLS  | [0.0695 0.0706] | [0.0374 0.0382] |
|                  | IRLS | [0.0575 0.0584] | [0.0540 0.0549] |
| ANCOVA condition | OLS  | [0.0494 0.0502] | [0.0493 0.0502] |
|                  | WLS  | [0.0699 0.0709] | [0.0379 0.0386] |
|                  | IRLS | [0.0578 0.0587] | [0.0546 0.0555] |
| ANCOVA covariate | OLS  | [0.0496 0.0505] | [0.0496 0.0504] |
|                  | WLS  | [0.0638 0.0648] | [0.0410 0.0418] |
|                  | IRLS | [0.0563 0.0572] | [0.0538 0.0547] |

387 *Table 1. Type I error rate binomial 95% confidence intervals at every time frames and channels for*  
 388 *simulated data under the null hypothesis.*  
 389

390 The WLS family-wise type 1 error rate (i.e. controlling the error for statistical testing across the  
 391 whole data space) examined using nullified ERP data from Wakeman and Henson (2015) shows  
 392 a good probability coverage for both maximum and cluster statistics with 95% confidence  
 393 intervals overlapping with the expected nominal value (figure 6). Individual mean values ranged  
 394 from 0.039 to 0.070 for maximum statistics (across subject average 0.052) and 0.044 to 0.07 for  
 395 spatial-temporal clustering (across subject average 0.051). Those results do not differ  
 396 significantly from OLS results (paired bootstrap t-test). Additional analyses based on the number  
 397 of bootstraps used to build the null distribution indicate that 800 to a 1000 bootstraps are  
 398 enough to obtain stable results, and that the errors do not appear at any spatial-temporal  
 399 locations, i.e. there are no sampling bias (maximum number of error occurring at the same  
 400 location was 0.05% using maximum statistics and 0.9% using spatial-temporal clustering, see  
 401 bottom for figure 6, error density maps).

402

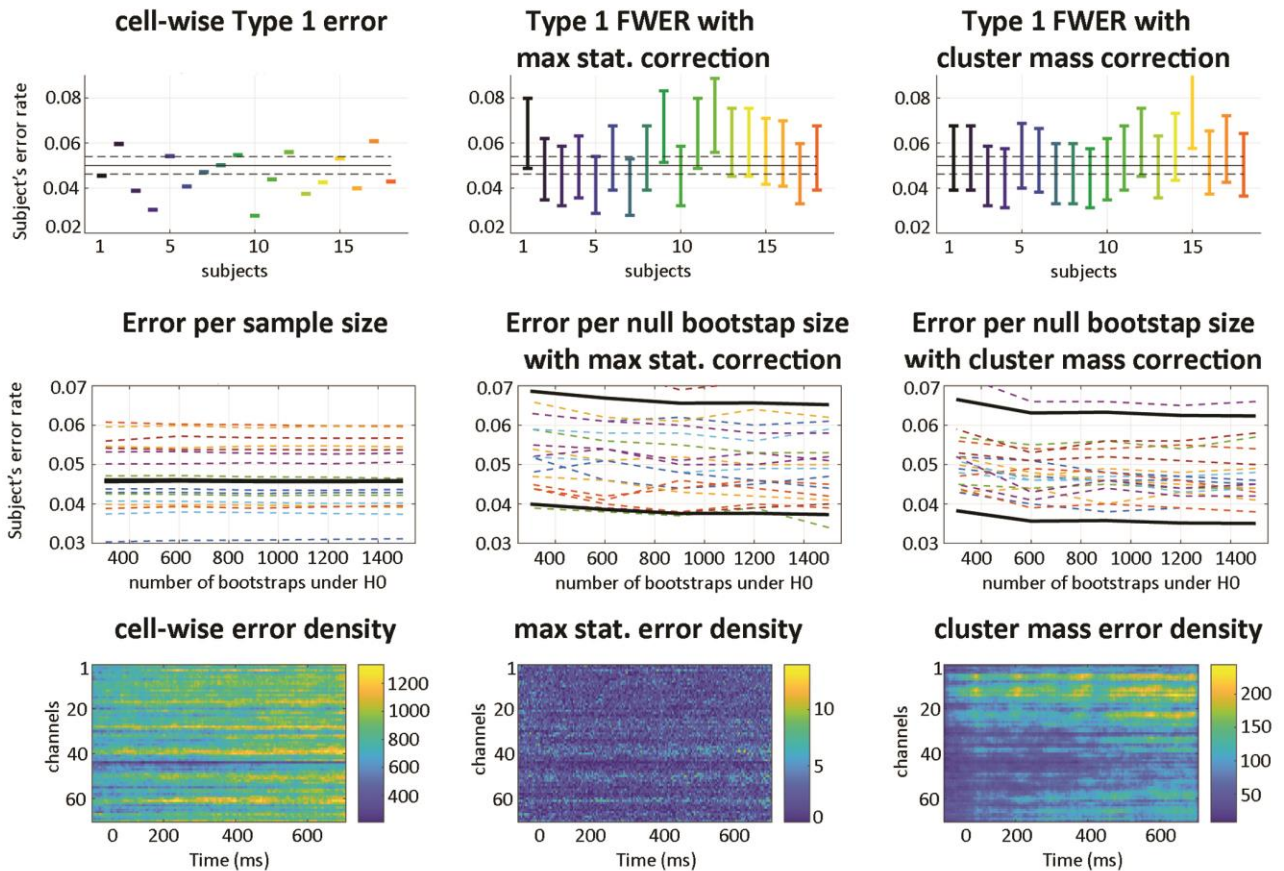

403

404 *Figure 6. Type 1 error rates under the null using the PCP-WLS method. On the top row are shown the*  
 405 *subjects' error rates: cell-wise, i.e. averaged across all time frames and channels, and corrected for the*  
 406 *whole data space, i.e. type 1 family wise error rate using either the distribution of maxima or the*  
 407 *distribution of the biggest cluster-masses. Results are within the expected range (marked by dotted black*  
 408 *lines) with overlapping 95% confidence intervals for maximum statistics and spatial-temporal clustering.*  
 409 *On the middle row are shown the effect of the number of resamples, with the tick lines representing the*  
 410 *95% average confidence interval. The cell-wise error is not affected since it does not depend directly on*  
 411 *this parameter to estimate the null (left) while using maximum statistics and cluster-mass distribution*  
 412 *estimates show a stronger dependency with results stable after 800 to 1000 bootstraps. On the bottom*  
 413 *row are shown error density maps (sum of errors out of 27000 null maps). The cell-wise error (i.e. no*  
 414 *correction for multiple comparisons) shows that errors accumulate, with some channels showing many*  
 415 *consecutive time frames with 5% error. By contrast, maximum statistics (middle) and the maximum*  
 416 *cluster-masses (right) do not show this effect (maxima at 0.05% and 0.9%), suggesting little to no spatial*  
 417 *bias in sampling.*

418

419 *Performance evaluation at the group level*

420

421 Repeated measures ANOVAs using parameter estimates from each method revealed 2 spatial-  
 422 temporal clusters for the face effect for both WLS and IRLS, but only the 1st cluster was declared  
 423 significant using OLS (table 2). The expected results (Wakeman & Henson, 2015) with full faces  
 424 having stronger N170 responses than scrambled faces are replicated for all approaches.

425 Maximum differences were observed over the N170 only when using OLS parameters. Using WLS  
 426 and IRLS gave maxima much later (P280), a result also observed when using TFCE rather than  
 427 spatial-temporal clustering. In each case, a repetition effect was also observed in a much more  
 428 consistent way among methods with the second presentation of stimuli differing from the 1st  
 429 and 3rd presentations (figure 7).  
 430

|                   | OLS                                                            | WLS                                                              | IRLS                                                           |
|-------------------|----------------------------------------------------------------|------------------------------------------------------------------|----------------------------------------------------------------|
| Face effect       |                                                                |                                                                  |                                                                |
| cluster 1         | 140ms to 504ms,<br>max=74, p=0.002 at<br>184ms channel EEG049  | 140ms to 424ms,<br>max=64, p= 0.002 at<br>280ms channel EEG017   | 136ms to 432ms,<br>max=74, p= 0.002 at<br>292ms channel EEG006 |
| cluster 2         |                                                                | 440ms to 648ms,<br>max=17.6, p= 0.032 at<br>616ms channel EEG057 | 520ms to 648ms,<br>max=22, p= 0.032 at<br>636ms channel EEG055 |
| TFCE              | max=74, p=0.026<br>at 184ms channel<br>EEG049                  | max=64, p=0.012<br>at 280ms channel<br>EEG017                    | max=74, p=0.012<br>at 292ms channel<br>EEG006                  |
| Repetition effect |                                                                |                                                                  |                                                                |
| cluster 1         | 232ms to 648ms,<br>max=50, p= 0.001 at<br>588ms channel EEG057 | 232ms to 648ms,<br>max=51, p= 0.001 at<br>612ms channel EEG045   | 236ms to 648ms,<br>max=52, p= 0.001 at<br>588ms channel EEG057 |
| TFCE              | max=50, p=0.002<br>at 588ms channel<br>EEG057                  | max=51, p= 0.001 at<br>612ms channel EEG045                      | max=52, p= 0.001 at<br>588ms channel EEG057                    |

431 *Table 2: Face and repetition effects results using cluster-mass correction and TFCE for each of the three*  
 432 *methods.*  
 433

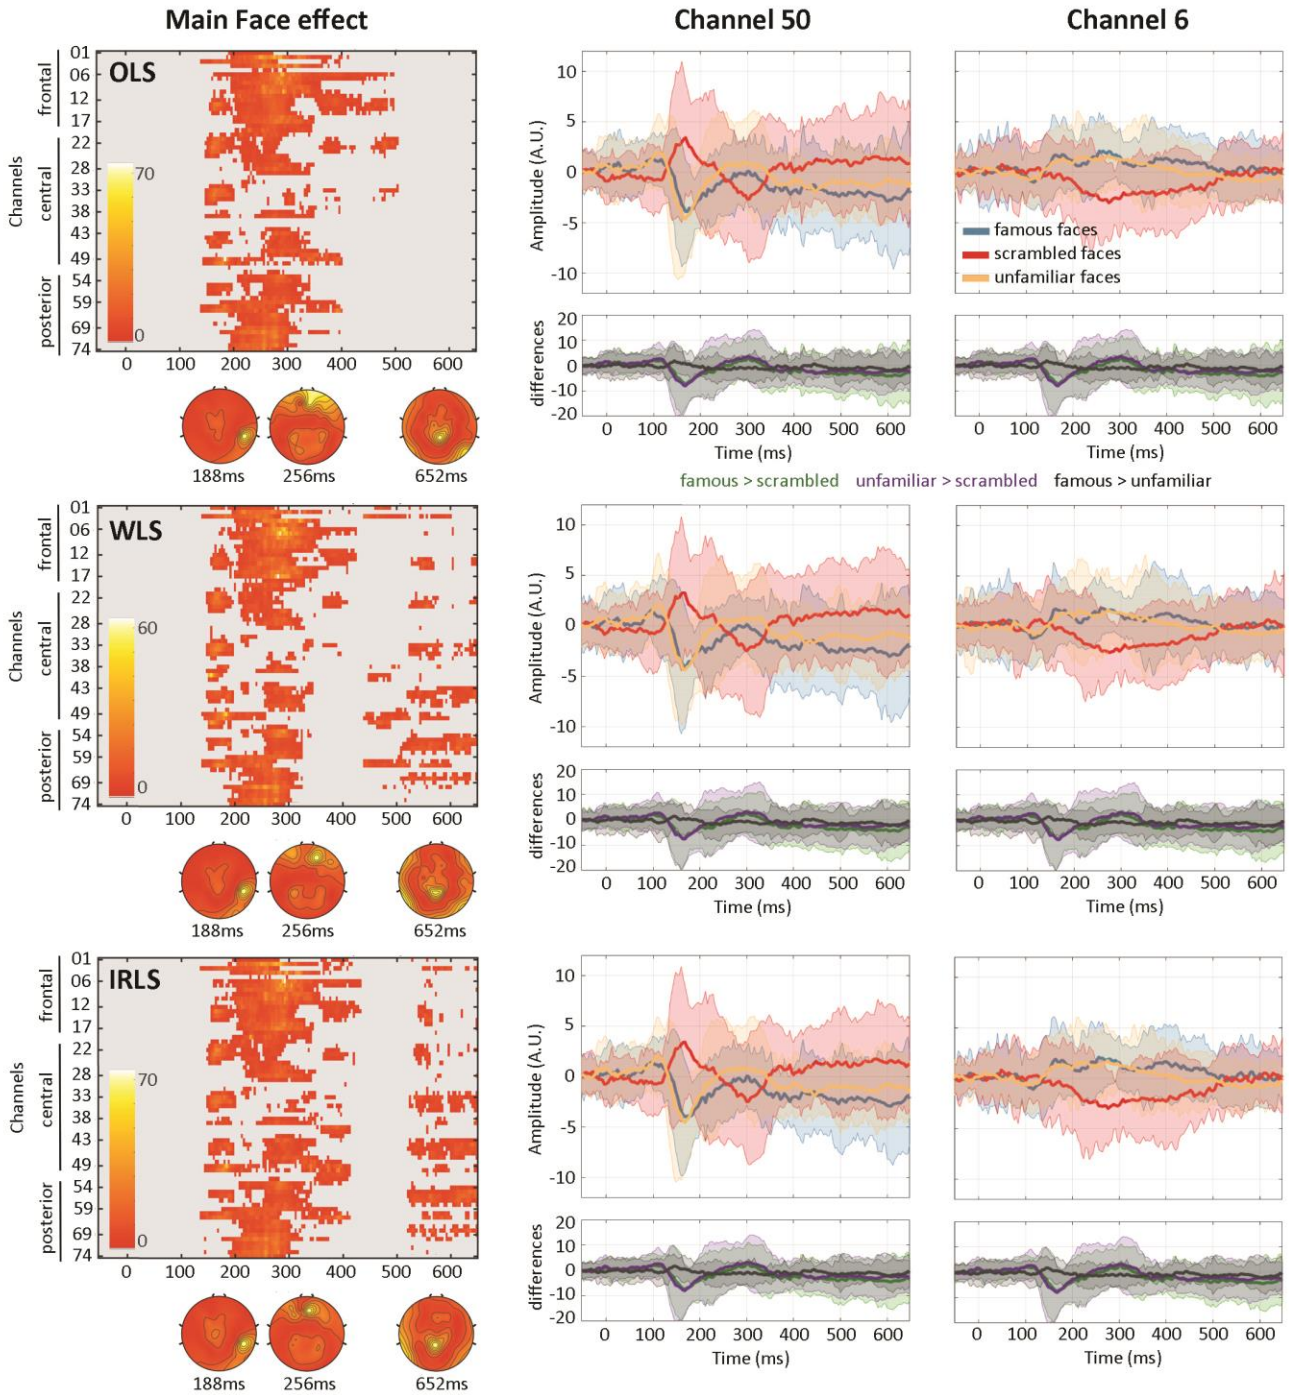

434  
435  
436  
437  
438  
439  
440

Figure 7. Face group effects observed using OLS, WLS or IRLS 1st level derived parameters. On the left hand side is shown the full channels \* times thresholded maps using cluster-mass ( $p < .05$ ) with topographies over maxima. In the middle and right hand side are shown time courses of the mean parameter estimates per condition (blue, red, orange) and condition differences (green, purple, black) over channel 50 (right inferior-temporal) and channel 6 (middle anterior frontal).

441 From the statistical maps, it can readily be observed that group results using 1st level WLS  
 442 parameter estimates lead to smaller F values. Median differences in Hotelling  $T^2$  values show  
 443 that effects were always smaller compared to using parameter estimates from OLS or IRLS  
 444 (Supplementary tables 2, 3 & table 3). Considering uncorrected p-values, this translates into less  
 445 statistical power (Face effect OLS 34% WLS 31% IRLS 34% of significant data frames, Repetition  
 446 effect OLS 39% WLS 35% IRLS 39% of significant data frames). Results based on corrected p-value  
 447 based on clustering showed however more statistical power for the Face effect (OLS 20% WLS  
 448 22% IRLS 25% of significant data frames with cluster mass and 3%, 5% 3% of significant data  
 449 frames with TFCE), and mixed results for the Repetition effect (OLS 31% WLS 28% IRLS 31% of  
 450 significant data frames with cluster mass and 7%, 8% 7% of significant data frames with TFCE).

451  
 452 Comparison of standardized distributions for the face effect and repetition effect showed a  
 453 general trend for more right skewed F-value and TFCE-value for WLS distributions than for OLS  
 454 and IRLS distributions vs. shorter tail for the interaction effect (figure 8). For the face effect, WLS  
 455 did not differ significantly from OLS or from IRLS when testing F-value deciles while TFCE values  
 456 differed significantly, from the 2nd decile onward when compared to OLS, and for deciles  
 457 2,3,4,7,8,9 compared to IRLS. For the repetition effect, WLS differed from OLS on deciles 2,7,8,9  
 458 for both F-values and TFCE values while it differed from IRLS on decile 9 only when looking at F-  
 459 values, and deciles 2,5,8,9 when looking at TFCE values. Finally, for the interaction effect, WLS  
 460 did not differ from OLS or IRLS in terms of F-values but had significantly weaker TFCE values than  
 461 OLS (deciles 1,3,6,7,8,9) and IRLS (all deciles but the 4th).

462  
 463

|             | face effect         | repetition effect   | interaction effect  |
|-------------|---------------------|---------------------|---------------------|
| WLS vs OLS  | -0.32 [-0.36 -0.28] | -0.54 [-0.59 -0.48] | -0.21 [-0.29 -0.13] |
| WLS vs IRLS | -0.34 [-0.39 -0.30] | -0.53 [-0.58 -0.48] | -0.14 -0.21 -0.08]  |

464 *Table 3. Median differences in Hotelling  $T^2$  values for each effect tested with percentile*  
 465 *bootstrap 95% confidence intervals ( $p=0.001$ ).*

466  
 467

|                         |                                   | OLS                    | WLS                    | IRLS                   |
|-------------------------|-----------------------------------|------------------------|------------------------|------------------------|
| Cluster 1<br>Channel 50 | Famous Faces vs.<br>Scrambled     | -4.93<br>[-12.2 2.32]  | -4.52<br>[-11.39 2.34] | -5.82<br>[-12.76 1.11] |
|                         | Unfamiliar Faces vs.<br>Scrambled | -4.77<br>[-12.42 2.86] | -4.64<br>[-13.02 3.72] | -5.19<br>[-11.93 1.54] |
|                         | Famous vs Unfamiliar<br>Faces     | -0.15<br>[-3.13 2.81]  | 0.12<br>[-3.28 3.53]   | -0.62<br>[-4.86 3.60]  |

|                         |                                       |                       |                        |                        |
|-------------------------|---------------------------------------|-----------------------|------------------------|------------------------|
| Cluster 1<br>Channel 6  | Famous Faces vs. Scrambled            | 2<br>[-5.25 9.25]     | 1.71<br>[-5.16 8.59]   | 1.68<br>[-6.05 9.41]   |
|                         | Unfamiliar Famous Faces vs. Scrambled | 3.21<br>[-5.80 12.22] | 2.20<br>[-5.97 10.38]  | 2.95<br>[-6.08 11.99]  |
|                         | Famous vs Unfamiliar Faces            | -1.20<br>[-5.72 3.30] | -0.49<br>[-5.03 4.04]  | -1.27<br>[-5.47 2.93]  |
| Cluster 2<br>Channel 50 | Famous Faces vs. Scrambled            | -4<br>[-13.82 5.82]   | -4.11<br>[-15.62 7.40] | -4.04<br>[-13.31 5.23] |
|                         | Unfamiliar Faces vs. Scrambled        | -2.16<br>[-9.20 4.87] | -2.17<br>[-9.83 5.48]  | -2.32<br>[-8.96 4.31]  |
|                         | Famous vs Unfamiliar Faces            | -1.83<br>[-6.47 2.81] | -1.93<br>[-9.76 5.88]  | -1.71<br>[-7.47 4.03]  |

468 *Supplementary table 2. Pairwise differences in mean parameter estimates (arbitrary unit) measured at*  
 469 *channel 50 and 6 at the maximum of the famous faces responses.*  
 470

|                    |      | medianT | maxT   | medianF | maxF  | medianCluster | maxCluster | medianTFCE | maxTFCE  |
|--------------------|------|---------|--------|---------|-------|---------------|------------|------------|----------|
| Face effect        | OLS  | 4.44    | 157.64 | 2.09    | 74.19 | 72.57         | 22591.41   | 130.41     | 40992.1  |
|                    | WLS  | 3.98    | 136.27 | 1.87    | 64.13 | 64.29         | 19453.52   | 85.72      | 35828.8  |
|                    | IRLS | 4.49    | 157.77 | 2.11    | 74.25 | 34.41         | 23300.19   | 130.88     | 54888.48 |
| Repetition Effect  | OLS  | 5.38    | 107.03 | 2.53    | 50.37 | 35.25         | 39116.91   | 244.38     | 82143.67 |
|                    | WLS  | 4.46    | 109.14 | 2.1     | 51.36 | 33.76         | 33979.02   | 129.89     | 76244.1  |
|                    | IRLS | 5.32    | 110.86 | 2.5     | 52.17 | 37.31         | 39870.66   | 212.27     | 98429.06 |
| Interaction Effect | OLS  | 5.45    | 126.31 | 1.12    | 26.01 | 23.79         | 387.94     | 27.64      | 483.46   |
|                    | WLS  | 5.17    | 78.15  | 1.06    | 16.09 | 21.14         | 317.38     | 25.69      | 470.1    |
|                    | IRLS | 5.32    | 135.67 | 1.09    | 27.93 | 30.57         | 283.44     | 22.9       | 366.41   |

471 *Supplementary table 3. Medians and maxima of the Hotelling  $T^2$ , F-values, Cluster-mass and TFCE scores*  
 472 *for each effect of the ANOVA and methods used at the 1st level.*  
 473

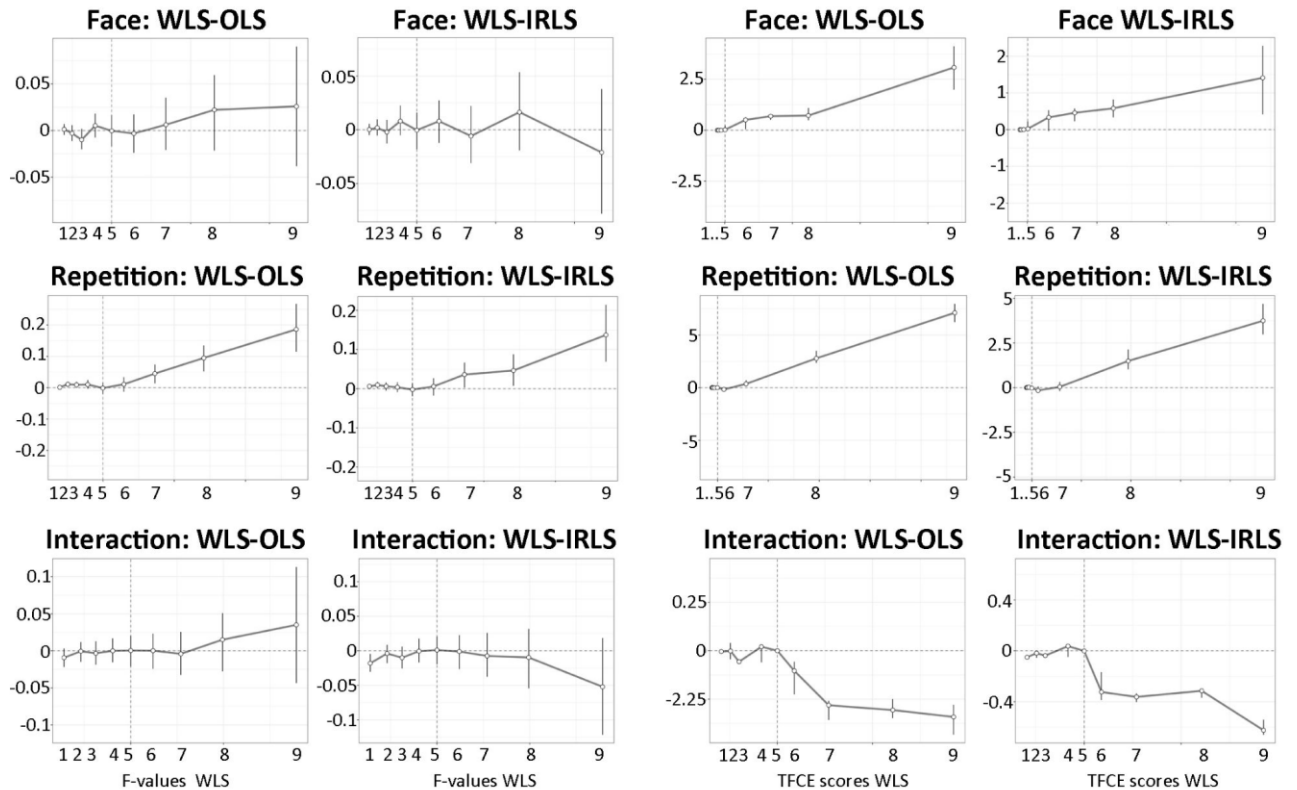

474  
475 *Figure 8. Shift function results comparing standardized F-value distributions for WLS to OLS and to IRLS*  
476 *for the face effect, repetition effect and their interaction.*

477  
478

## 479 Discussion

480

481 Simulation and data driven results indicate that the proposed WLS-PCP method is efficient at  
482 down weighting trials with dynamics differing from the bulk, leading to more accurate estimates.  
483 Results show that, for ERP, deriving weights based on the temporal profile provides a robust  
484 solution against white noise or uncontrolled oscillations. For biological (pink) noise and amplitude  
485 variations which do not alter the temporal profile, the PCP algorithm does not classify well outlier  
486 trials, leading to a decrease in detection performance compared with white, alpha or gamma  
487 noise. Rather than a defect, we see this as biologically relevant (see below). Importantly, even in  
488 those cases of failed detection, the overall correlations with the ground truth remained high  
489 ( $\geq 0.99$ ). When analyzing real data, differences in amplitude variations were nevertheless  
490 captured by the PCP/WLS approach, with variations related to trials which were out of phase with  
491 the bulk of the data.

492

493 Group-level analyses of the face dataset replicated the main effect of face type (faces>scrambled)  
494 in a cluster from  $\sim 150$ ms to  $\sim 350$ ms but also revealed a late effect ( $>500$ ms), observed when  
495 using 1st level WLS and IRLS parameter estimates but absent when using OLS parameter  
496 estimates. Despite more data frames declared significant with WLS than OLS, effects sizes were  
497 smaller (and also smaller than IRLS). The shape of distributions when using WLS parameter

498 estimates were however more right skewed than when using OLS or IRLS, leading clustering/tfce  
499 corrections to declare more data points as significant. Indeed under null, very similar  
500 distributions of maxima are observed leading to more power for the more skewed distributions.  
501 The interplay between 1st level regularization, 2nd level effect size, and multiple comparison  
502 procedures depends on many parameters and it is not entirely clear how statistical power is  
503 affected by their combination and requires deeper investigation via simulations. Empirically, we  
504 can nethertheless conclude that group results were statistically more powerful using robust  
505 approaches at the subject level than when using OLS.

506  
507 Using the trial dynamics (temporal or spectral profile) to derive a single weight per trial makes  
508 sense, not just because the observed signal is autocorrelated, but also because it is biologically  
509 relevant. Let's consider first the signal plus noise model for ERP (Hillyard, 1985; Jervis et al., 1983;  
510 Shah, 2004). In this conceptualization, ERPs are time-locked additive events running on top of  
511 background activity. An outlier time frame for a given trial may occur if 1) the evoked amplitude  
512 deviates from the bulk, or 2) the background activity deviates from the rest of the background  
513 activity. In the former case, the additional signal may be conceived either as a single process (a  
514 chain of neural events at a particular location) or a mixture of processes (multiple, coordinated  
515 neural events). In both cases, the data generating process is thought to be evolving over time  
516 (auto-regressive) which speaks against flagging or weighting a strong deviation at a particular  
517 time frame only. What is likely, is that a minimum of consecutive time frames are seen as  
518 deviating, even though only one time frame is deemed an outlier. In the latter case (assuming no  
519 artefacts from recordings), a background deviation implies that for an extremely brief period of  
520 time, a large number of neurons synchronized for non-experimentally related reasons, and this  
521 event did not reoccur in other trials. Although we do not contend that such events cannot happen  
522 in general, this means that, in the context of ERP outlier detection, the background activity varies  
523 by an amount several folds bigger than the signal, which goes against theory and observations.  
524 Let's consider now the phase resetting model (Makeig, S. et al., 2002; Sayers et al., 1974). In this  
525 model, ERPs are emerging from the phase synchronization among trials, i.e., the occurrence of a  
526 stimulus reset the background activity. If a given trial deviates from the rest of other trials, this  
527 implies that it is out-of-phase. In this scenario, deriving different weights for different time  
528 frames (i.e. IRLS solution) means that the time course is seen as an alternation of 'normal' and  
529 outlying time frames, which has no meaningful physiological interpretation.

530  
531 In conclusion, we propose a fast and straightforward weighting scheme for trials based on their  
532 temporal (or spectral) profiles. Results indicate that it captures well undesired noise leading to  
533 increased precision and possibly increased statistical power (more effect detected) at the group  
534 level.

### 535 **Acknowledgements**

536  
537  
538 Thank you to EEGLAB/LIMO MEEG users who engaged with the beta version, got stuck but  
539 persevered until we solved their issues.

540  
541



542 **References**

- 543
- 544 Christensen, R. (2002). *Plane Answers to Complex Questions. The theory of Linear Models*. (3rd  
545 ed.). Springer.
- 546 Delorme, A., & Makeig, S. (2004). EEGLAB: An open source toolbox for analysis of single-trial EEG  
547 dynamics including independent component analysis. *Journal of Neuroscience Methods*,  
548 *134*(1), 9–21. <https://doi.org/10.1016/j.jneumeth.2003.10.009>
- 549 Filzmoser, P., Maronna, R., & Werner, M. (2008). Outlier identification in high dimensions.  
550 *Computational Statistics & Data Analysis*, *52*(3), 1694–1711.
- 551 Hillyard, S. A. (1985). Electrophysiology of human selective attention. *Trends in Neurosciences*, *8*,  
552 400–405. [https://doi.org/10.1016/0166-2236\(85\)90142-0](https://doi.org/10.1016/0166-2236(85)90142-0)
- 553 Hoaglin, D. C., & Welsch, R. E. (1978). The Hat Matrix in Regression and ANOVA. *The American*  
554 *Statistician*, *32*(1), 17–22. <https://doi.org/10.2307/2683469>
- 555 Jervis, B. W., Nichols, M. J., Johnson, T. E., Allen, E., & Hudson, N. R. (1983). A Fundamental  
556 Investigation of the Composition of Auditory Evoked Potentials. *Biomedical Engineering,*  
557 *IEEE Transactions On, BME-30*(1), 43–50. <https://doi.org/10.1109/TBME.1983.325165>
- 558 Kothe, C. A., & Makeig, S. (2013). BCILAB: A platform for brain-computer interface development.  
559 *Journal of Neural Engineering*, *10*(5), 056014. [https://doi.org/10.1088/1741-](https://doi.org/10.1088/1741-2560/10/5/056014)  
560 [2560/10/5/056014](https://doi.org/10.1088/1741-2560/10/5/056014)
- 561 Makeig, S., Westerfield, M., Jung, T-P., Enghoff, S., Townsend, J., Courchesne, E., & Sejnowski,  
562 T.J. (2002). Dynamic Brain Sources of Visual Evoked Responses. *Science*, *295*(5555), 690–  
563 694.
- 564 Maris, E. & Oostenveld, R. (2007). Nonparametric statistical testing of EEG- and MEG-data.  
565 *Journal of Neuroscience Methods*, *164*(1), 177–190.
- 566 Onton, J., Westerfield, M., Townsend, J., & Makeig, S. (2006). Imaging human EEG dynamics using  
567 independent component analysis. *Neuroscience & Biobehavioral Reviews*, *30*(6), 808–  
568 822. <https://doi.org/10.1016/j.neubiorev.2006.06.007>
- 569 Pernet, C.R., Latinus, M., Nichols, T. E., & Rousselet, G. A. (2015). Cluster-based computational  
570 methods for mass univariate analyses of event-related brain potentials/fields: A  
571 simulation study. *Journal of Neuroscience Methods*, *250*, 85–93.  
572 <https://doi.org/10.1016/j.jneumeth.2014.08.003>
- 573 Pernet, C.R., Appelhoff, S., Gorgolewski, K. J., Flandin, G., Phillips, C., Delorme, A., & Oostenveld,  
574 R. (2019). EEG-BIDS, an extension to the brain imaging data structure for  
575 electroencephalography. *Scientific Data*, *6*(1), 103. [https://doi.org/10.1038/s41597-019-](https://doi.org/10.1038/s41597-019-0104-8)  
576 [0104-8](https://doi.org/10.1038/s41597-019-0104-8)
- 577 Pernet, C.R., Chauveau, N., Gaspar, C., & Rousselet, G. A. (2011). LIMO EEG: A Toolbox for  
578 Hierarchical Linear MOdeling of ElectroEncephaloGraphic Data. *Computational*  
579 *Intelligence and Neuroscience*, *2011*, 1–11. <https://doi.org/10.1155/2011/831409>
- 580 Pernet, C.R., Martinez-Cancino, R., Truong, D., Makeig, S., & Delorme, A. (2021). From BIDS-  
581 Formatted EEG Data to Sensor-Space Group Results: A Fully Reproducible Workflow With  
582 EEGLAB and LIMO EEG. *Frontiers in Neuroscience*, *14*, 610388.  
583 <https://doi.org/10.3389/fnins.2020.610388>
- 584 Pion-Tonachini, L., Kreutz-Delgado, K., & Makeig, S. (2019). The ICLabel dataset of  
585 electroencephalographic (EEG) independent component (IC) features. *Data in Brief*, *25*,

- 586 104101. <https://doi.org/10.1016/j.dib.2019.104101>
- 587 Sayers, B. MCA., Beagley, H. A., & Henshall, W. R. (1974). The Mechanism of Auditory Evoked EEG
- 588 Responses. *Nature*, 247(5441), 481–483. <https://doi.org/10.1038/247481a0>
- 589 Shah, A. S. (2004). Neural Dynamics and the Fundamental Mechanisms of Event-related Brain
- 590 Potentials. *Cerebral Cortex*, 14(5), 476–483. <https://doi.org/10.1093/cercor/bhh009>
- 591 Yeung, N., Bogacz, R., Holroyd, C., Nieuwenhuis, S., & Cohen, J. (2018). *Simulated EEG data*
- 592 *generator* [Matlab]. <https://data.mrc.ox.ac.uk/data-set/simulated-eeg-data-generator>
